# Supplementary material for: The skull of the carettochelyid turtle &lt;i&gt;Anosteira&lt;/i&gt; &lt;i&gt;pulchra&lt;/i&gt; from the Eocene (Uintan) of Wyoming and the carotid canal system of carettochelyid turtles
Source: Copernicus journal article supplement (doi:10.5194/fr-21-301-2018), 2018-12-13
Supplement: Supplementary file 1 [file fr-21-301-2018-supplement.zip]

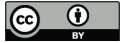

*Supplement of*

**The skull of the carettochelyid turtle *Anosteira pulchra* from the Eocene (Uintan) of Wyoming and the carotid canal system of carettochelyid turtles**

**Walter G. Joyce et al.**

*Correspondence to:* Walter G. Joyce ([walter.joyce@unifr.ch](mailto:walter.joyce@unifr.ch))

- [fr-21-301-2018-supplement-title-page.pdf](#)
- [Joyce\\_etal\\_Matrix.nex](#)

The copyright of individual parts of the supplement might differ from the CC BY 4.0 License.
